# Supplementary material for: In vitro fertilization and embryo transfer alter human placental function through trophoblasts in early pregnancy
Source: PubMed Central journal article supplement — Mol Med Rep. 2020 Jan 31;21(4):1897–909. doi: 10.3892/mmr.2020.10971 (PMC7057775; doi:10.3892/mmr.2020.10971), 2020-01-31
Supplement: Supplementary_Data.pdf [file Supplementary_Data.pdf]

Table SI. Mean optical density of positive expression of selected genes between the IVF-ET and control groups.

| Name  | IVF-ET      | Control group | P-value |
|-------|-------------|---------------|---------|
| AFP   | 0.067±0.005 | 0.061±0.004   | 0.008   |
| VEGF  | 0.068±0.006 | 0.032±0.009   | 0.005   |
| TF    | 0.082±0.008 | 0.057±0.010   | 0.014   |
| TUBB1 | 0.024±0.009 | 0.040±0.011   | 0.003   |
| MT1G  | 0.044±0.012 | 0.058±0.014   | 0.037   |
| BCL2  | 0.036±0.004 | 0.040±0.004   | 0.013   |
| GCM1  | 0.042±0.010 | 0.057±0.008   | 0.009   |
| EGFR  | 0.072±0.011 | 0.086±0.009   | 0.008   |
| PTEN  | 0.062±0.008 | 0.072±0.012   | 0.011   |
| LAIR2 | 0.058±0.011 | 0.076±0.014   | 0.008   |

Data are presented as the mean ± standard deviation. IVF-ET, *in vitro* fertilization and embryo transfer; AFP,  $\alpha$ -fetoprotein; VEGF, vascular endothelial growth factor; TF, transferrin; TUBB1, tubulin  $\beta$ 1 class VI; MT1G, metallothionein 1G; GCM1, glial cells missing transcription factor 1; EGFR, epidermal growth factor receptor; LAIR2, leukocyte associated immunoglobulin like receptor 2.
